# Supplementary material for: A lysin motif effector subverts chitin‐triggered immunity to facilitate arbuscular mycorrhizal symbiosis
Source: PubMed Central journal article supplement (PMC6916333; doi:10.1111/nph.16245), 2019-11-23
Supplement: NPH-225-448-s001.pdf [file NPH-225-448-s001.pdf]

***New Phytologist* Supporting Information**

**Article title: A LysM effector subverts chitin-triggered immunity to facilitate arbuscular mycorrhizal symbiosis**

Authors: Tian Zeng, Luis Rodriguez-Moreno, Artem Mansurkhodzaev, Peng Wang, Willy van den Berg, Virginie Gascioli, Sylvain Cottaz, Sébastien Fort, Bart P.H.J. Thomma, Jean-Jacques Bono, Ton Bisseling, Erik Limpens

Article acceptance date: 24 September 2019

The following Supporting Information is available for this article:

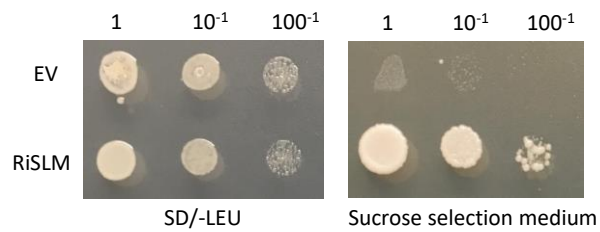

**Fig. S1 Yeast signal sequence trap.** pYST-02-RiSLM, representing a fusion of full length RiSLM (including its endogenous signal sequence) with an invertase, and the empty pYST-02 vector (EV) were transformed into *Saccharomyces cerevisiae* Y02321, and grown on SD/-Leu (containing glucose) and sucrose selection medium at different dilutions for 3 days at 30 °C.

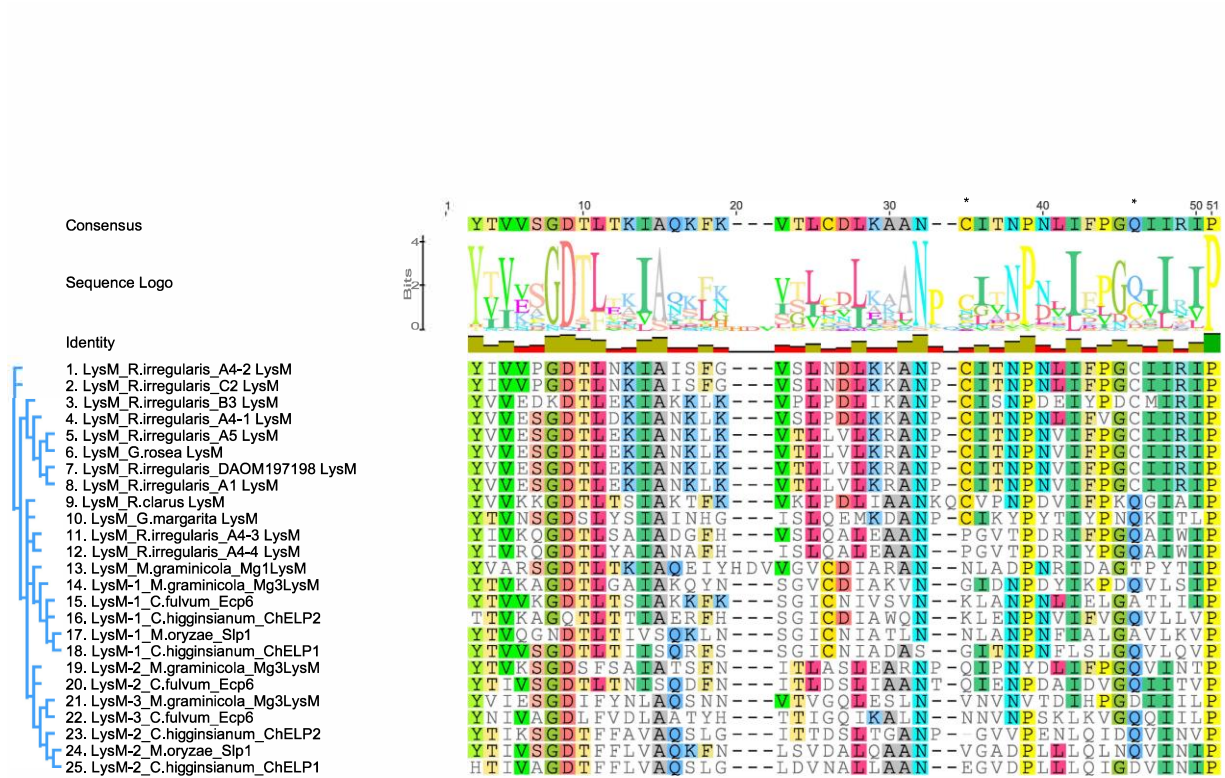

**Fig. S2 Comparison of LysM domains from AM fungal or pathogenic LysM effectors.**

MAFFT was used to align all amino acid sequences. Neighbour-joining Tree was built using Geneious tree builder.

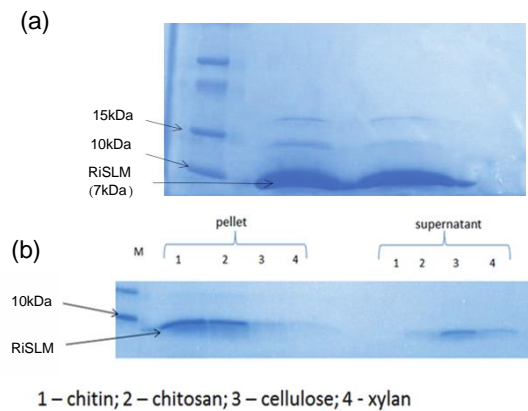

**Fig. S3 Purified RiSLM protein binds chitin and chitosan.** (a) Coomassie stained protein gel of RiSLM (size ~7kDa) purified from *Escherichia coli* ORIGAMI. (b) Coomassie stained protein gel of affinity precipitation assays showing that RiSLM binds to insoluble chitin and chitosan but not xylan and cellulose. For the latter two polymers the vast majority of the protein is retained in the supernatant.

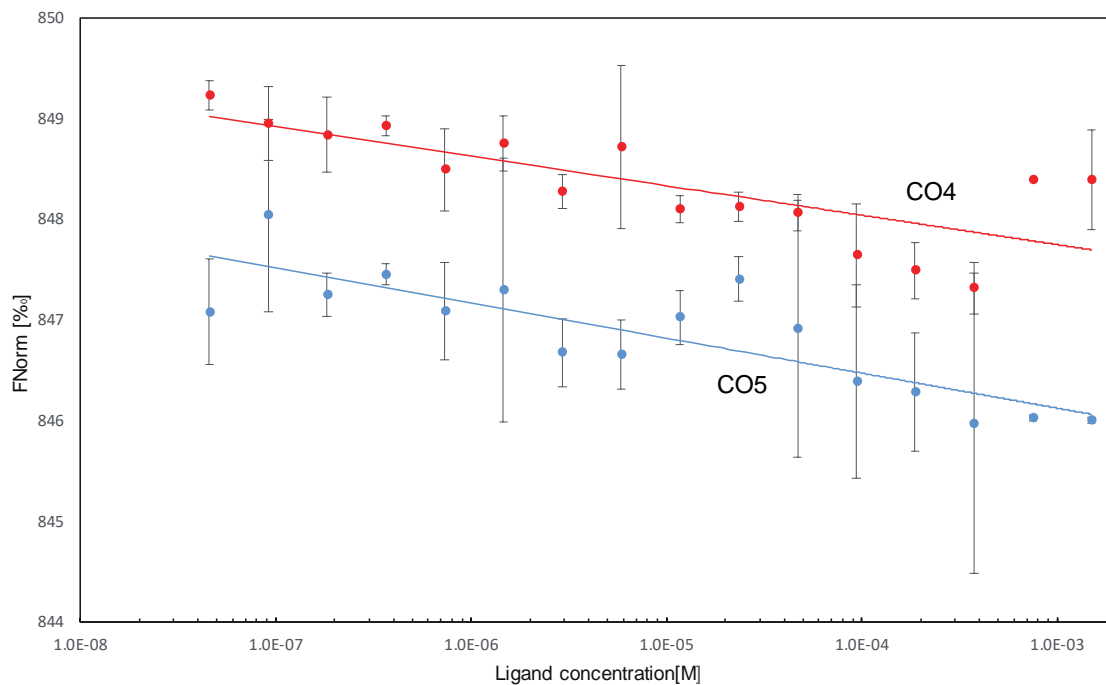

**Fig. S4 RiSLM does not bind deacylated chitotetraose (CO4) and chitopentaose (CO5) as revealed by microscale thermophoresis.** Binding experiments using microscale thermophoresis do not show any interaction with RiSLM in the range of concentrations tested (up to 1 mM). Error bars represent standard deviation from two independent measurements using two batches of independently purified proteins.

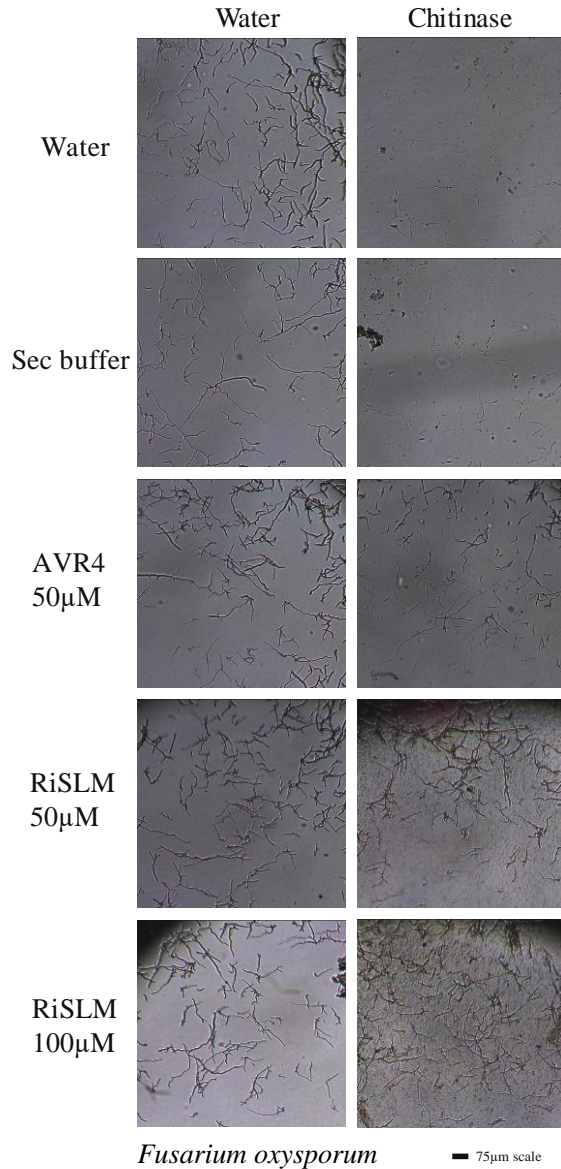

**Fig. S5 RiSLM protects hyphae from the pathogenic fungus *Fusarium oxysporum f.sp lycopersici* against plant chitinases.** Germinated hyphae are treated with 50 μM AVR4, 50 μM RiSLM or 100 μM RiSLM and incubated at room temperature for 2 hours, and subsequently treated with a tomato chitinase preparation or water for 4 hours. Water or buffer used for size-exclusion chromatography (SEC) were used as negative controls. The Avr4 effector from *Cladosporium fulvum* was used as positive control.

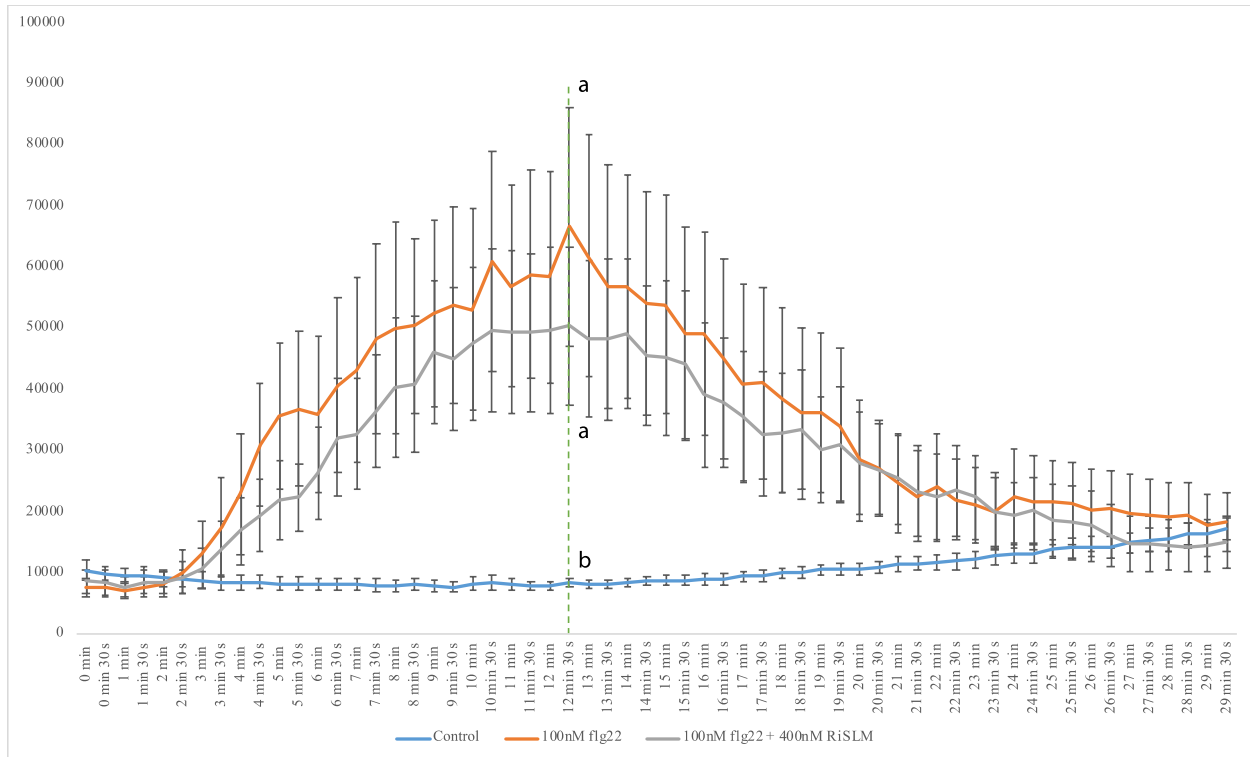

**Fig. S6 RiSLM does not suppress flg22-induced reactive oxygen species (ROS) production.**

*Medicago truncatula* A17 root pieces were treated with 100nM flg22 with or without 400nM RiSLM . Error bars represent standard error from 6 (control and 100nM flg22 + 400nM RiSLM treated) or 5 (100nM flg22 treated) biological replicates. Different letters indicate significant difference (LSD  $p < 0.05$ ) between different treatments at the indicate time point (green dotted line).

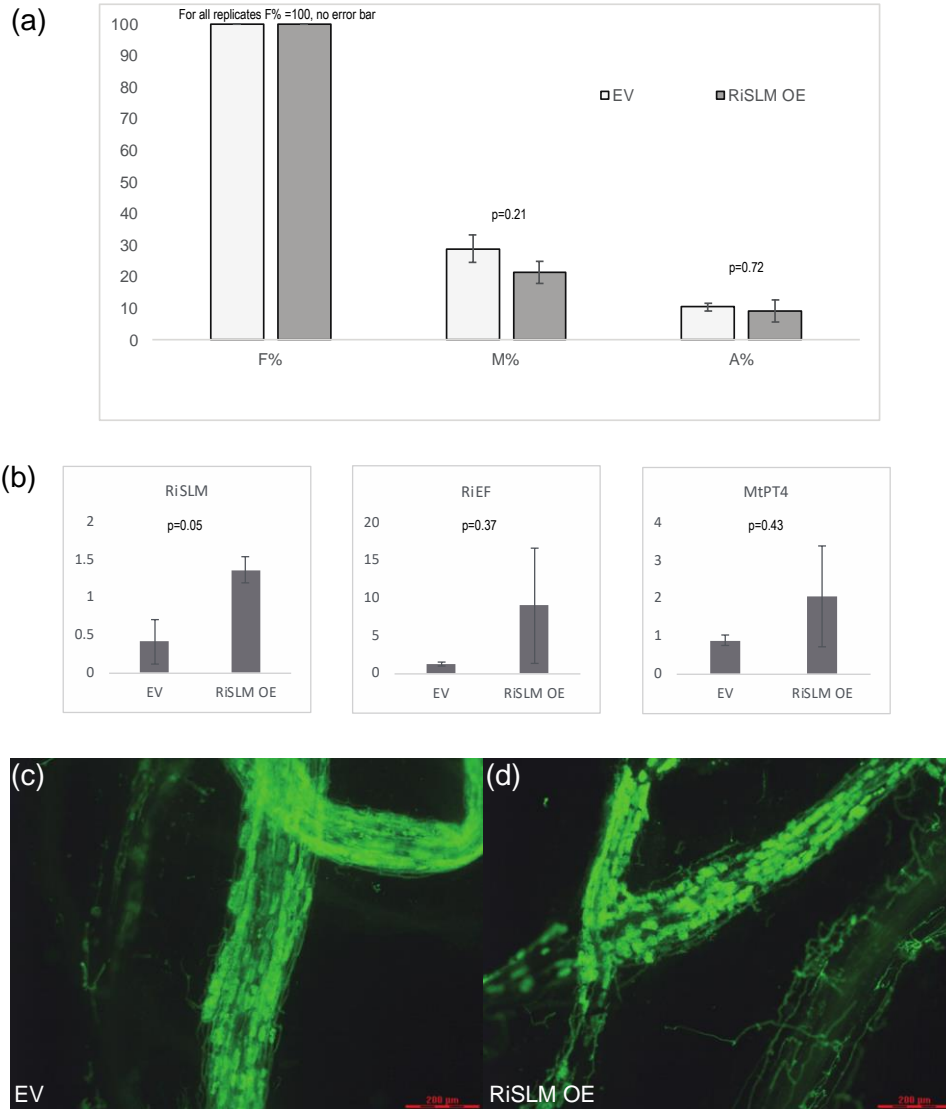

**Fig. S7 Figure S7. *RiSLM* overexpression does not enhance mycorrhization in *Medicago***

***truncatula*.** (a) Frequency (F%), mycorrhization intensity in the root (M%), or arbuscule

abundance in the root (A%) are not affected by overexpressing of *RiSLM*. (b) qPCR analysis of

control and *RiSLM* overexpressing roots showing *RiSLM* expression level relative to

*Rhizophagus irregularis* elongation factor *RiEF* and *MtPT4* expression levels relative to

*Medicago* elongation factor *MtEF*. Error bar represents standard error from 3 replicates. (c, d)

WGA-alex488 staining of mycorrhization in *RiSLM* overexpressed roots (d) or control roots (c).

Scale bar = 200 μm.



**Table S1 Primers used in this research.**

| Primer           | Sequence                                     | Note                                                              |
|------------------|----------------------------------------------|-------------------------------------------------------------------|
| RiSLM_SP-F       | CTGAATTCATGAGACTCAATCAATCTTTGCTC             | for cloning into pYST-02                                          |
| RiSLM_SP-R       | AAGCGGCCGCAAACATCTAGTAGCATTAGGTA<br>TCC      |                                                                   |
| MtEPI-qPCR-F     | GGTTGTGTGTGTAACAGGTGCTTCA                    | qPCR primers for three defence marker genes                       |
| MtEPI-qPCR-R     | AGGGTCACGAACAGTGGCTCTA                       |                                                                   |
| MtPAL-qPCR-F     | GCAAGGGCCGGTGTGAAGC                          |                                                                   |
| MtPAL-qPCR-R     | GGCAGCACCAAAGCCAGTGGT                        |                                                                   |
| MtTHA-qPCR-F     | GGCGCAATCCCACCAGCAAC                         |                                                                   |
| MtTHA-qPCR-R     | ACCACTCCCACCTTGTGGCG                         |                                                                   |
| MtVapyrin-qPCR-F | TCATCCTCCACAACAACAAGGT                       | qPCR primers for three symbiotic marker genes                     |
| MtVapyrin-qPCR-R | TCAAGCACTTCTCTTATGTCATCCATTG                 |                                                                   |
| MtPUB1-qPCR-F    | GTAGCAGCAAAAGGCACAAG                         |                                                                   |
| MtPUB1-qPCR-R    | ATATCGGTTCGAACCAGTTGC                        |                                                                   |
| MtTUBB1-qPCR-F   | GAACAGTTCTCTGCCATGTTTCAGAA                   |                                                                   |
| MtTUBB1-qPCR-R   | TCTTCATAAACTGGGGCATCCTGGT                    |                                                                   |
| MtEF-qPCR-F      | GATTGCCACACCTCTCACAT                         | qPCR primer for Medicago EF                                       |
| MtEF-qPCR-R      | TCAGCGAAGGTCTCAACCAC                         |                                                                   |
| RiEF-qPCR-F      | AACCCCTTCGTCTTCCACTT                         | qPCR primer for Rizophagus EF                                     |
| RiEF-qPCR-R      | ATTGTTTCGTGGTGCATTCA                         |                                                                   |
| RiSLM-qPCR-F     | AACGTAATCTTTCCCGTTG                          | qPCR primer for RiSLM                                             |
| RiSLM-qPCR-R     | TGGTGTATTTCTCTCACGGCTA                       |                                                                   |
| RiSLM-HIGS-F     | AAAAAAGCAGGCTTCATGAGACTCAATCAATCTTTG<br>CTC  | primers to make RiSLM HIGS construct                              |
| RiSLM-HIGS-R     | CAAGAAAGCTGGGTCGATTTGTAATACAAGGATTTG<br>CTCT |                                                                   |
| RiSLM_F_EcoR1    | GAATTCGCAATTAAGACATGTACTCC                   | primers used to clone RiSLM into pET-SUMO                         |
| RiSLM_R_Hind3    | AAGCTTATTATTA AAAACATCTAGTAGCATTAG<br>GTATCC |                                                                   |
| F-RiSLM          | AGAAGACTCAGGTGCAATTAAGACATGTACTC<br>CG       | Primers for LO golden gate cloning ( <i>RiSLM</i> overexpression) |
| R-RiSLM          | GGAAGACAGCGAAAAACATCTAGTAGCATTAG<br>G        |                                                                   |

**Table S2 Coding sequences of LysM effectors from different AM fungal species or isolates.**

|                                                                                                               |                                                                                                                                                                                                                                                                             |
|---------------------------------------------------------------------------------------------------------------|-----------------------------------------------------------------------------------------------------------------------------------------------------------------------------------------------------------------------------------------------------------------------------|
| RiSLM [organism= <i>Rhizophagus irregularis</i> ] isolate DAOM197198<br>LysM effector<br>RiSLM completely CDS | ATGAGACTCAATCAATCTTTGCTCCTCTTAACCGTCCTTTTCG<br>CCCTTATTGCTGTTGCTTCATGTGCAATTAAGACATGTA<br>GGTTTATGTTGTTGAGAGTGGTGATACCCTTGAAAAATCGC<br>GAATAAACTTAAGGTGACCTTGCTAGTTTTGAAAAGAGCAA<br>TCCTTGATTACAAATCCGAACGTAATCTTTCCCGGTTGTATT<br>ATCCGGATACCTAATGCTACTAGATGTTTTTAA         |
| RiSLM_A1<br>[organism= <i>Rhizophagus irregularis</i> ] isolate A1<br>LysM effector completely CDS            | ATGAGACTCAATCAATCTTTGCTCCTCTTAACCGTCCTTTTCG<br>CCCTTATTGCTGTTGCTTCATGTGCAATTAAGACATGTA<br>GGTTTATGTTGTTGAGAGTGGTGATACCCTTGAAAAATCGC<br>GAATAAACTTAAGGTGACCTTGCTAGTTTTGAAAAGAGCAA<br>TCCTTGATTACAAATCCGAACGTAATCTTTCCCGGTTGTATT<br>ATCCGGATACCTAATGCTACTAGATGTTTTTAA         |
| RiSLM_A5<br>[organism= <i>Rhizophagus irregularis</i> ] isolate A5<br>LysM effector completely CDS            | ATGAGACTCAATCAATCTTTGCTCCTCTTAACCGTCCTTTTCG<br>CCCTTATTGCTGTTGCTTCATGTGCAATTAAGACATGTA<br>GGTTTATGTTGTTGAGAGTGGTGATACCCTTGAAAAATCGC<br>GAATAAACTTAAGGTGACCTTGCTAGTTTTGAAAAGAGCAA<br>TCCTTGATTACAAATCCGAACGTAATCTTTCCCGGTTGTATT<br>ATCCGGATACCTAATGCTACTAGATGTTTTTAA         |
| RiSLM-1_A4<br>[organism= <i>Rhizophagus irregularis</i> ] isolate A4<br>LysM effector-1 completely CDS        | ATGAGACTCAATCAATCTTTGCTCCTCTTAACCATCCTTTTCG<br>CCCTTATTGCTGTTGCTTCATGTGCAGTTAAGACATGTA<br>GGTTTATGTTGTTGAGAGTGGTGATACCCTTGATAAAATCGC<br>GAATAAACTTAAGGTGTCCTTGCCAGATTTGAAAAAAGCAA<br>TCCTTGATTACAAATCCGAACCTAATCTTTGTCGGTTGTATT<br>ATCCGGATACCTAATGCTACTGGATGTTTTTAA        |
| RiSLM-2_A4<br>[organism= <i>Rhizophagus irregularis</i> ] isolate A4<br>LysM effector-2 completely CDS        | ATGAGACTCAATAAATCTTTGCTCCTCTTAACCATCCTTTTCG<br>CCCTTATTGCTGTTGCTTCATCTCAGCGTCTGACGACATGTA<br>TCGGGTTTATATTGTTGTGCCTGGTGATACCCTTAATAAAATC<br>GCGATAAGTTTTGGTGTGTCCTTGAATGACTTGAAAAAAGCA<br>AATCCTTGATTACAAATCCGAACCTAATCTTTCCCGGTTGCA<br>TTATCCGGATACCTAATCGTACTCAATGTTTTTAA |
| RiSLM-3_A4<br>[organism= <i>Rhizophagus irregularis</i> ] isolate A4<br>LysM effector-3 completely CDS        | ATGAGACTCAGCCTATTTTTTCTCCCCTTAACCATCATTTTCG<br>CCCTTATTGCTGCTGTTGCTTCGGCTGGTTGGTATATAGTTAA<br>ACAGGGTGATACCCTTTCTGCTATCGCGGATGGGTTTCATGTA<br>TCCTTGCAAGCTTTGGAAGCCGCTAATCCGGGAGTTACTCCG<br>GACAGAATCTTTCTGGACAAGCTATCTGGATACCCTAA                                           |
| RiSLM-4_A4<br>[organism= <i>Rhizophagus irregularis</i> ] isolate A4<br>LysM effector-4 completely CDS        | ATGAGACTCAGCCTATTTTTTCTCCCCTTAACCATCCTTTTCG<br>CCTTATTGCTTCTGTTGCTTCGGCTGGTTGGTATATAGTTAGA<br>CAGGGTGATACCCTTTATGCTATCGCGAATGCGTTTCATATAT<br>CCTTGCAAGCTTTGGAAGCCGCTAATCCGGGAGTTACTCCGG<br>ACAGAATCTATCCTGGACAAGCTATCTGGATACCCTAA                                           |
| RiSLM_B3                                                                                                      | ATGAGACTCAATCTATCTTTGCTCCCCTTGACCATCCTTTTCG                                                                                                                                                                                                                                 |

|                                                                                                              |                                                                                                                                                                                                                                                                                         |
|--------------------------------------------------------------------------------------------------------------|-----------------------------------------------------------------------------------------------------------------------------------------------------------------------------------------------------------------------------------------------------------------------------------------|
| [organism=<br><i>Rhizophagus<br/>irregularis</i> ] isolate<br>B3 LysM effector<br>completely CDS             | CCCTTATTGCTGTTGCTTCATGTGCAACTATGAAATGTGCTCC<br>GGTTTATGTTGTTGAGGATAAAGATACTCTTGAAAAATCGC<br>GAAAAACTTAAGGTGCCCTTGCCAGATTTGATAAAAGCTAA<br>TCCTTGTATTTCAAATCCGGACGAAATCTATCCTGATTGCATG<br>ATCCGGATACCTAAACAACTAAATGCACTAAGGTTTGTATT<br>TTATCTTTATTGTTTATATTTATCGATTACTACTAA               |
| RiSLM_C2<br>[organism=<br><i>Rhizophagus<br/>irregularis</i> ] isolate<br>C2 LysM effector<br>completely CDS | ATGAGACTCAATCAATCTTTGCTCCTCTTAACCATCCTTTTCG<br>CCCTTATTGCTGTTGCATCATCTCAGCGTCTGACGACATGTAT<br>TCAGGTTTATATTGTTGTGCCTGGTGATACCCTTAATAAAATC<br>GCGATAAGTTTTGGTGTGTCCTTGAATGACTTGAAAAAGCA<br>AATCCTTGTATTACAAATCCGAACCTAATCTTTCCCGGTTGCA<br>TTATCCGGATACCTAATCGTACTAAATGTTTTTAA            |
| RcSLM [organism=<br><i>Rhizophagus<br/>clarus</i> ]<br>LysM effector<br>completely CDS                       | ATGAAACACAATCTATTTTTGCTCTCCTTAACCATCCTTTTCG<br>CGCTTAGTGCTTTTACTGATGTTACTTCGGCTGCTGCGAAAGG<br>GTTTAGATATGTTGTTAAAAAGGGTGATACCCTTACCAGCAT<br>CGCGAAAACTTTTAAAGTAAAATTGCCTGATTTGATCGCGGC<br>TAATAAGCAGTGTGTTCCAAATCCGGACGTAATCTTTCCCAA<br>ACAAGGTATCGCGATACCTCAGTACTGTCCCGTCTGTCCGTA<br>G |
| GrSLM [organism=<br><i>Gigaspora<br/>rosea</i> ]<br>LysM effector<br>completely CDS                          | ATGAGACTCTGTTTATTTTTGCTTCCCTTAACCATCATTTTCGC<br>CTTTATTGCTGCTGTTGCTTCAATCAATTGTTGCTATACAGTT<br>AACTCAGGCGATTCCCTTTATTCCATCGCAATTAATCATGGCA<br>TAAGCTTGCAAGAAATGAAAGATGCTAATCCATGCATTAAT<br>ACCCGTACACTATTTATCCAATCAAAAAATCACGCTCCCTA<br>ACCAACCATACTGTTGA                               |
| GmSLM [organism=<br><i>Gigaspora<br/>margarita</i> ] LysM<br>effector completely<br>CDS                      | ATGAGACTCAATCAATATTTGCTCCTCTTAACCGTCCTTTTCG<br>CCCTTATTGCTGTTGCTTCATGTGCAATTAAGACATGTACTCC<br>GGTTTATGTTGTTGAGAGTGGTGATACCCTTGAAAAATCGC<br>GAATAAACTTAAGGTGACCTTGCTAGTTTTGAAAAGAGCAAA<br>TCCTTGTATTACAAATCCGAACGTAATCTTTCCCGGTTGTATT<br>ATCCGGATACCTAATGCTACTAGATGTTTTTAA               |
